# Supplementary material for: Bionic optical physical unclonable functions for authentication and encryption
Source: Royal Society of Chemistry journal article supplement (doi:10.1039/d1tc02883a), 2021-01-01
Supplement: d1tc02883a1.pdf [file d1tc02883a1.pdf]

Electronic Supplementary Material (ESI) for Journal of Materials Chemistry C. This journal is  
© The Royal Society of Chemistry 2021

## Supporting Information

### **Bionic Optical Physical Unclonable Functions for Authentication and Encryption**

Yongbiao Wan,<sup>‡ab</sup> Pidong Wang,<sup>‡ab</sup> Feng Huang,<sup>ab</sup> Jun Yuan,<sup>ab</sup> Dong Li,<sup>ab</sup> Kun Chen,<sup>ab</sup> Jianbin  
Kang,<sup>ab</sup> Qian Li,<sup>ab</sup> Taiping Zhang,<sup>ab</sup> Song Sun,<sup>ab</sup> Zhiguang Qiu<sup>\*c</sup> and Yao Yao<sup>\*ab</sup>

<sup>a</sup> Microsystem & Terahertz Research Center, China Academy of Engineering Physics, Chengdu 610200, China.

Email: yaoyao\_mtrc@caep.cn

<sup>b</sup> Institute of Electronic Engineering, China Academy of Engineering Physics, Mianyang 621999, China.

<sup>c</sup> School of Electronics and Information Technology, State Key Lab of Opto-Electronic Materials & Technologies, Guangdong Province Key Lab of Display Materials and Technologies, Sun Yat-sen University, Guangzhou 510275, China.

Email: zhiguangqiu88@gmail.com

<sup>‡</sup> These authors contributed equally to this work.

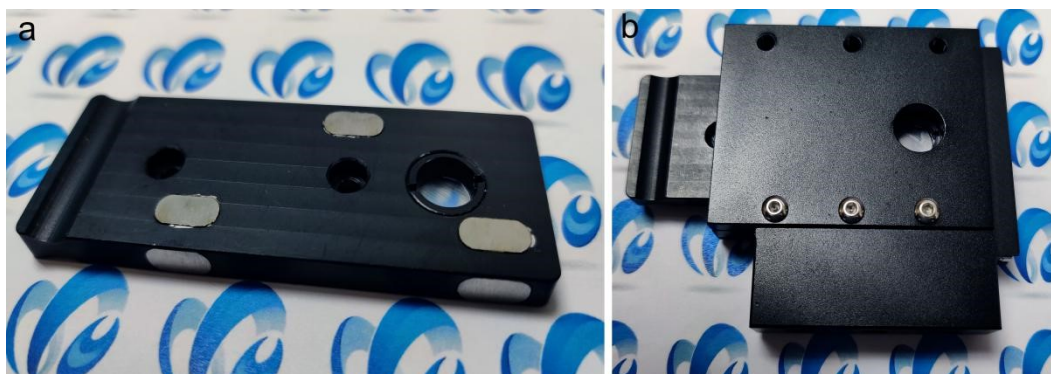

**Fig. S1.** The actual photos of a) a bionic PUF card and b) the slot inserted card.

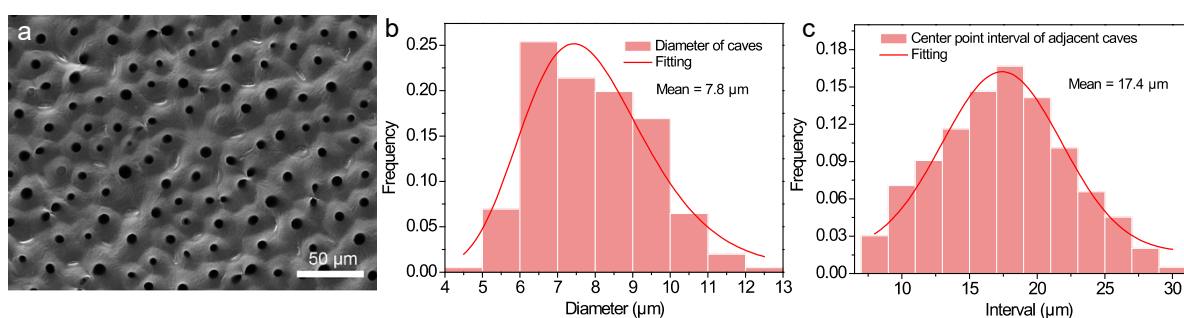

**Fig. S2.** a) Top view SEM image of lotus leaf based PDMS film. b) Statistical distribution of diameter of the caves in panel a, showing the average diameter of 7.8  $\mu\text{m}$  and the distribution range from 4  $\mu\text{m}$  to 13  $\mu\text{m}$ . c) Statistical distribution of interval distance of the adjacent caves in panel a, demonstrating the average interval gap of 17.4  $\mu\text{m}$  and the coverage from 9  $\mu\text{m}$  to 30  $\mu\text{m}$ .

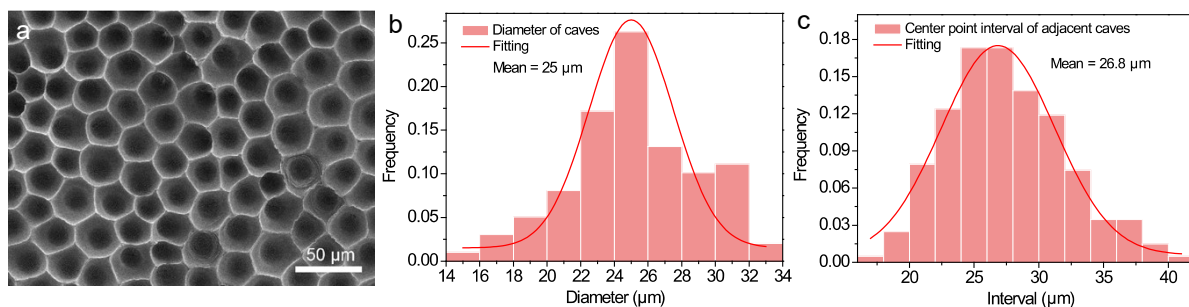

**Fig. S3.** a) Top view SEM image of rose petal based PVA film. b) Statistical distribution of diameter of the caves in panel a, showing the average diameter of 25  $\mu\text{m}$  and the distribution range from 14  $\mu\text{m}$  to 34  $\mu\text{m}$ . c) Statistical distribution of center point interval distance of the adjacent caves in panel a, demonstrating the average interval gap of 26.8  $\mu\text{m}$  and the coverage from 17  $\mu\text{m}$  to 42  $\mu\text{m}$ .

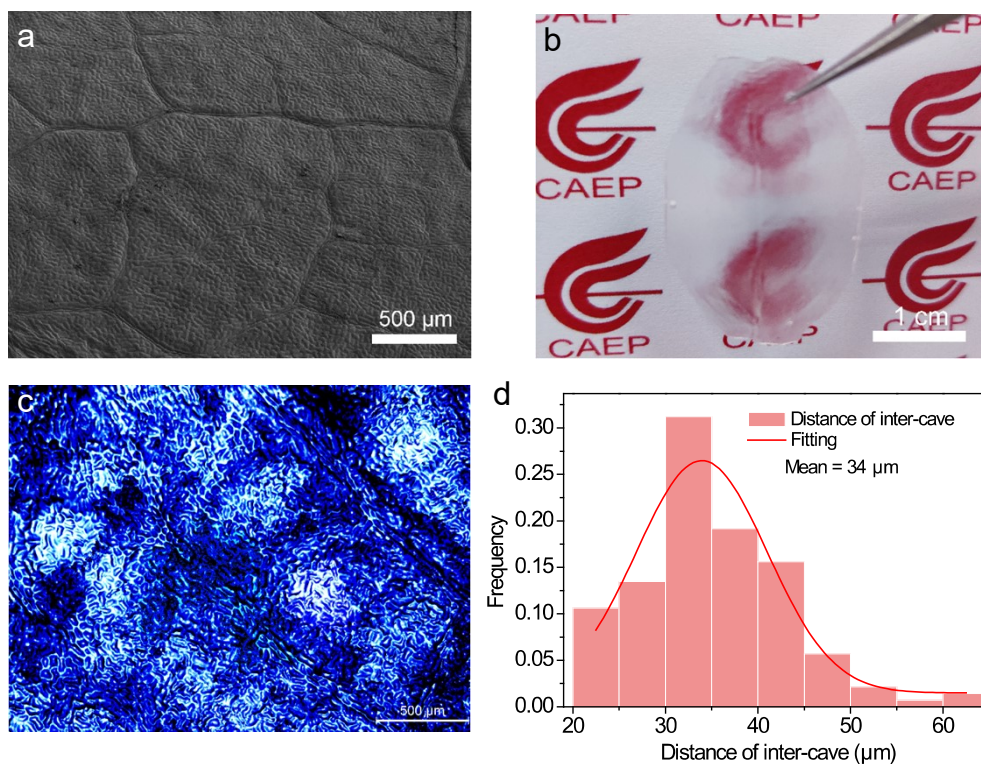

**Fig. S4.** a) SEM image of rose leaf. b) Photograph and c) top view optical morphology of rose leaf based bionic PDMS film. d) Statistical distribution of the distance of inter-cave in panel c, indicating the average interval gap of 34  $\mu\text{m}$  and the coverage from 20  $\mu\text{m}$  to 65  $\mu\text{m}$ .

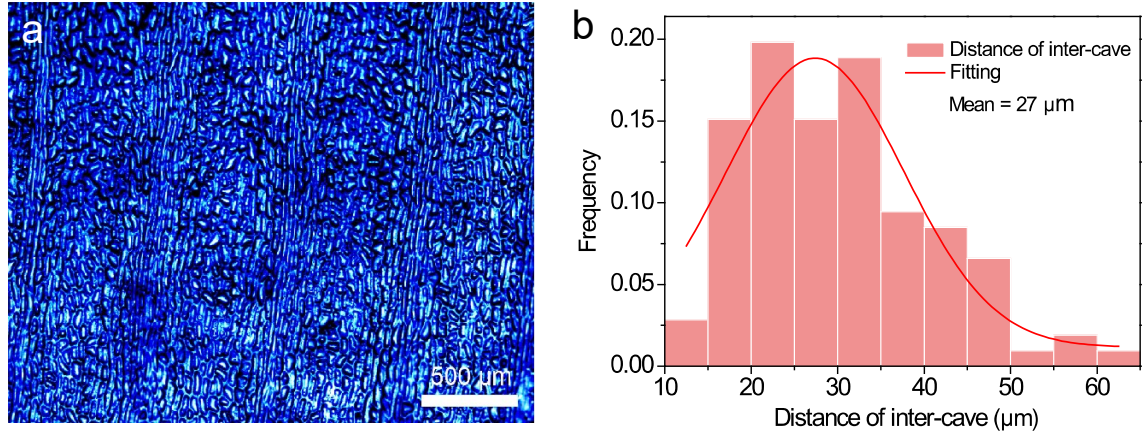

**Fig. S5.** a) Top-view optical morphology of ginkgo leaf based-bionic PDMS film. b) Statistical distribution of the distance of inter-cave in panel a, showing the average interval distance of 27  $\mu\text{m}$  and the coverage from 10  $\mu\text{m}$  to 65  $\mu\text{m}$ .

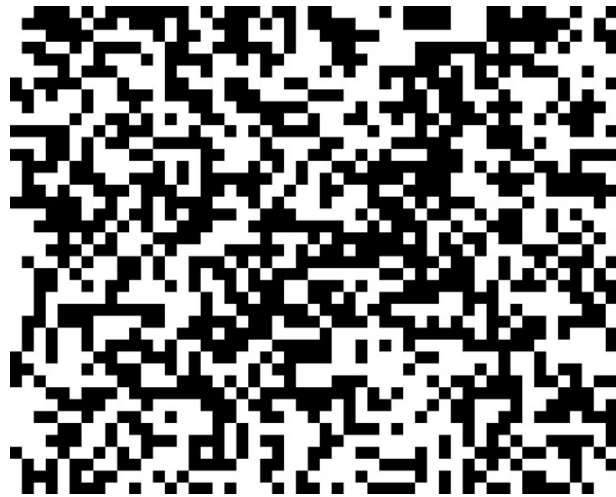

**Fig. S6.** A random phase pattern for modulating the input laser beam, which creates a desirable challenge.

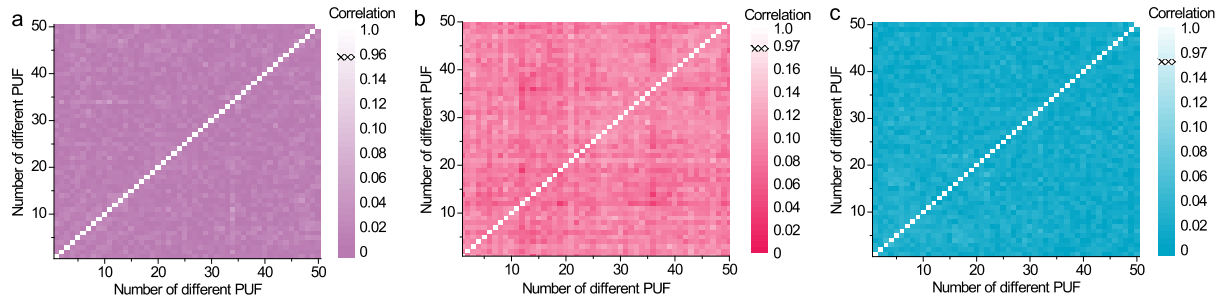

**Fig. S7.** Correlation coefficients of inter-chip PUFs based on a) rose petal, b) rose leaf, and c) ginkgo leaf, respectively. Inter-chip means that 50 different bionic PUFs were tested and compared with each other.

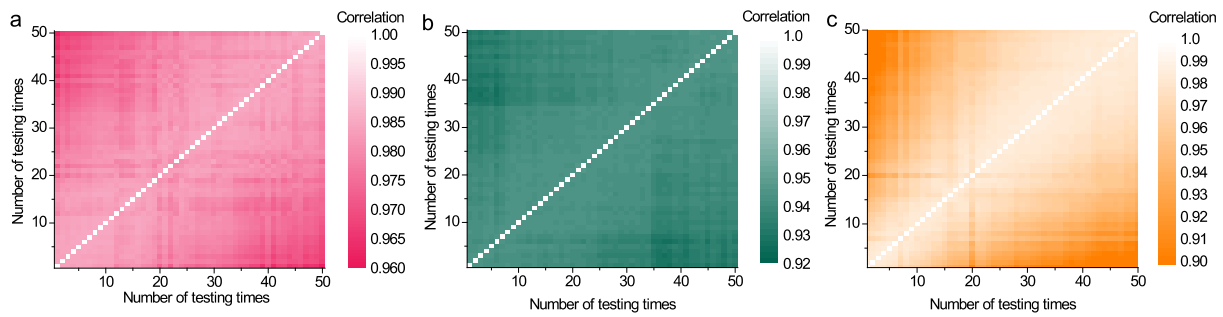

**Fig. S8.** Correlation coefficients of intra-chip PUFs based on a) rose petal, b) rose leaf, and c) ginkgo leaf, respectively. Intra-chip presents that one PUF card was repeatedly tested over 50 times.

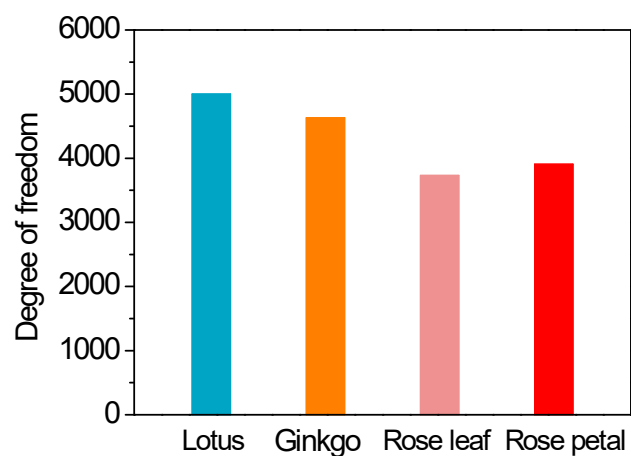

**Fig. S9.** Degree of freedom of these four kinds of bionic PUFs outputs.

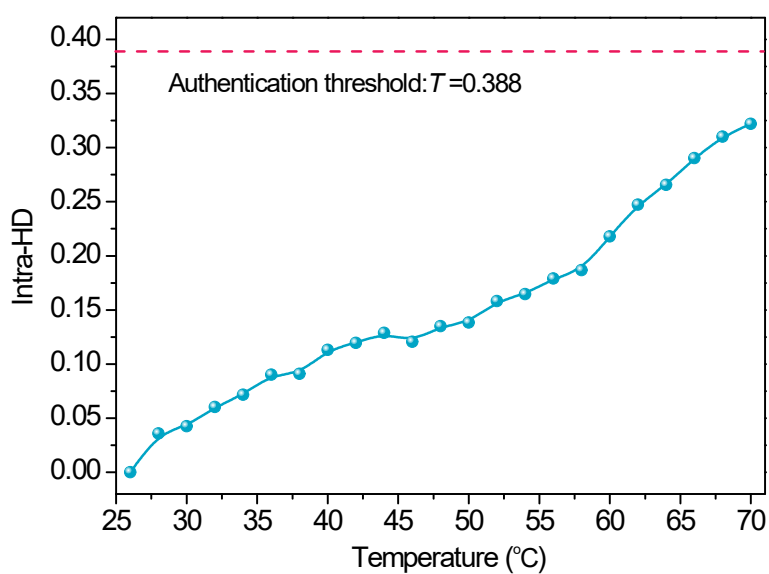

**Fig. S10.** Performance of the authentication protocol against thermal vibration. Intra-HDs ascend with increasing temperature while maintain below authentication threshold of 0.388, showing the reliability of PUF card within a certain temperature range.
